# Supplementary material for: Simultaneous targeting of XPO1 and BCL2 as an effective treatment strategy for double-hit lymphoma
Source: PubMed Central journal article supplement (PMC6868798; doi:10.1186/s13045-019-0803-9), 2019-11-21

# Figure S1

**A**

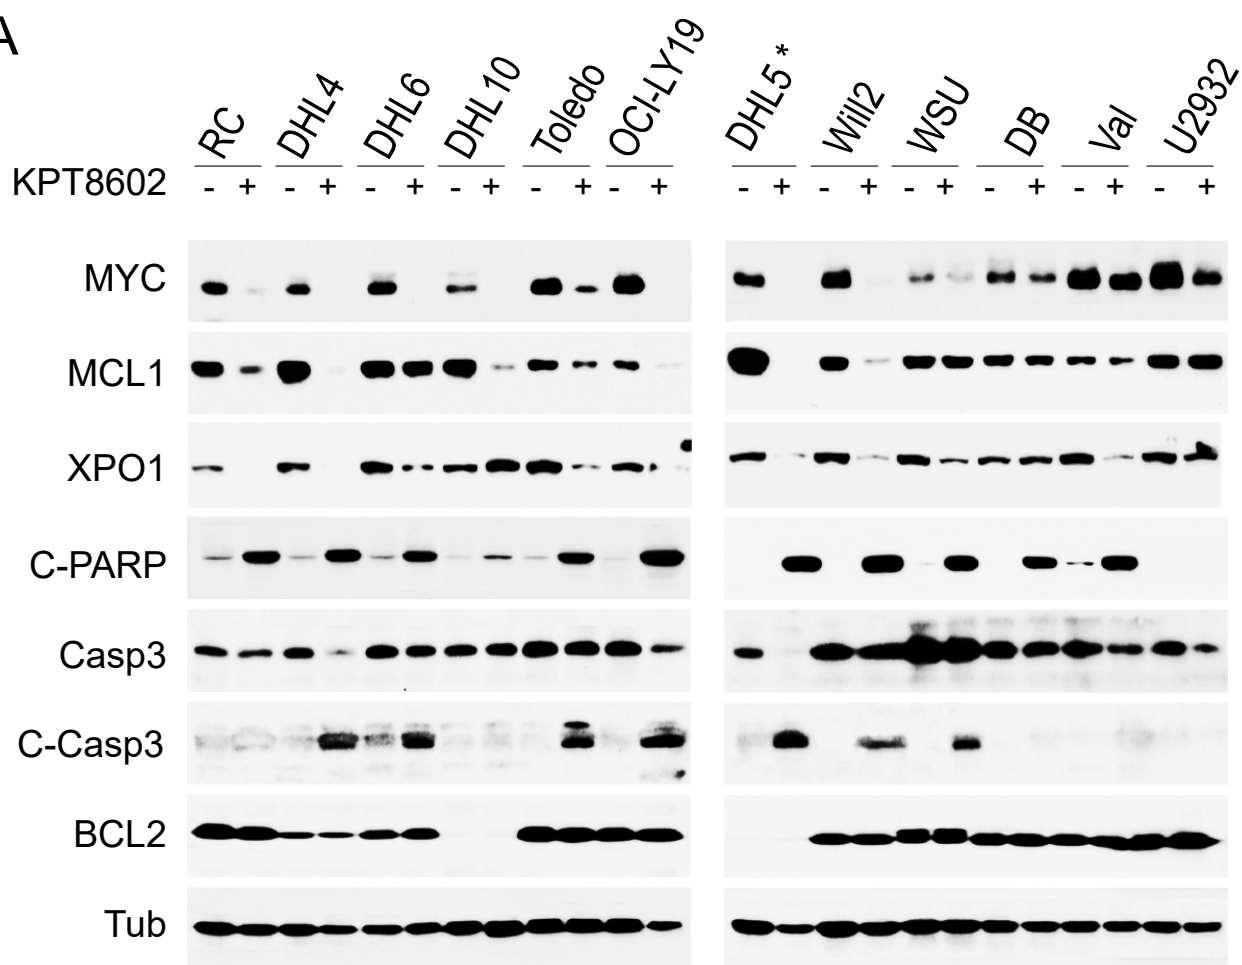

**B**

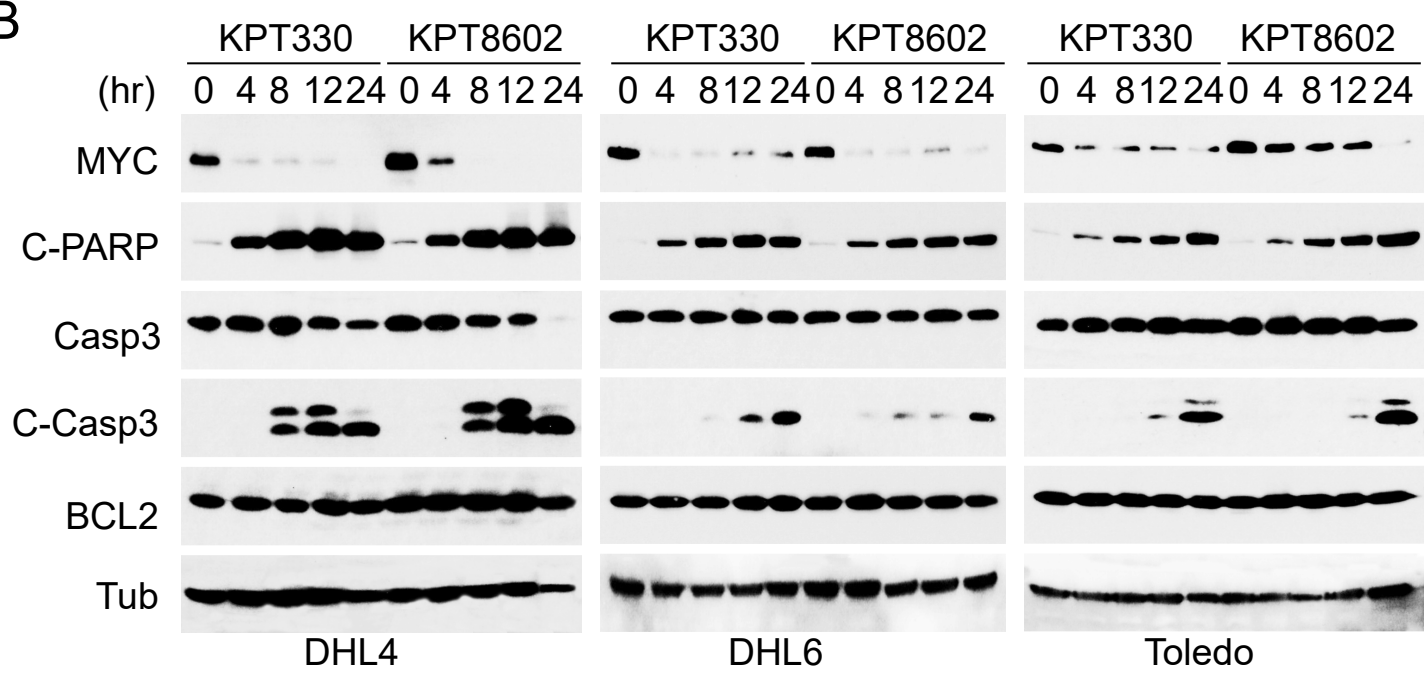

**C**

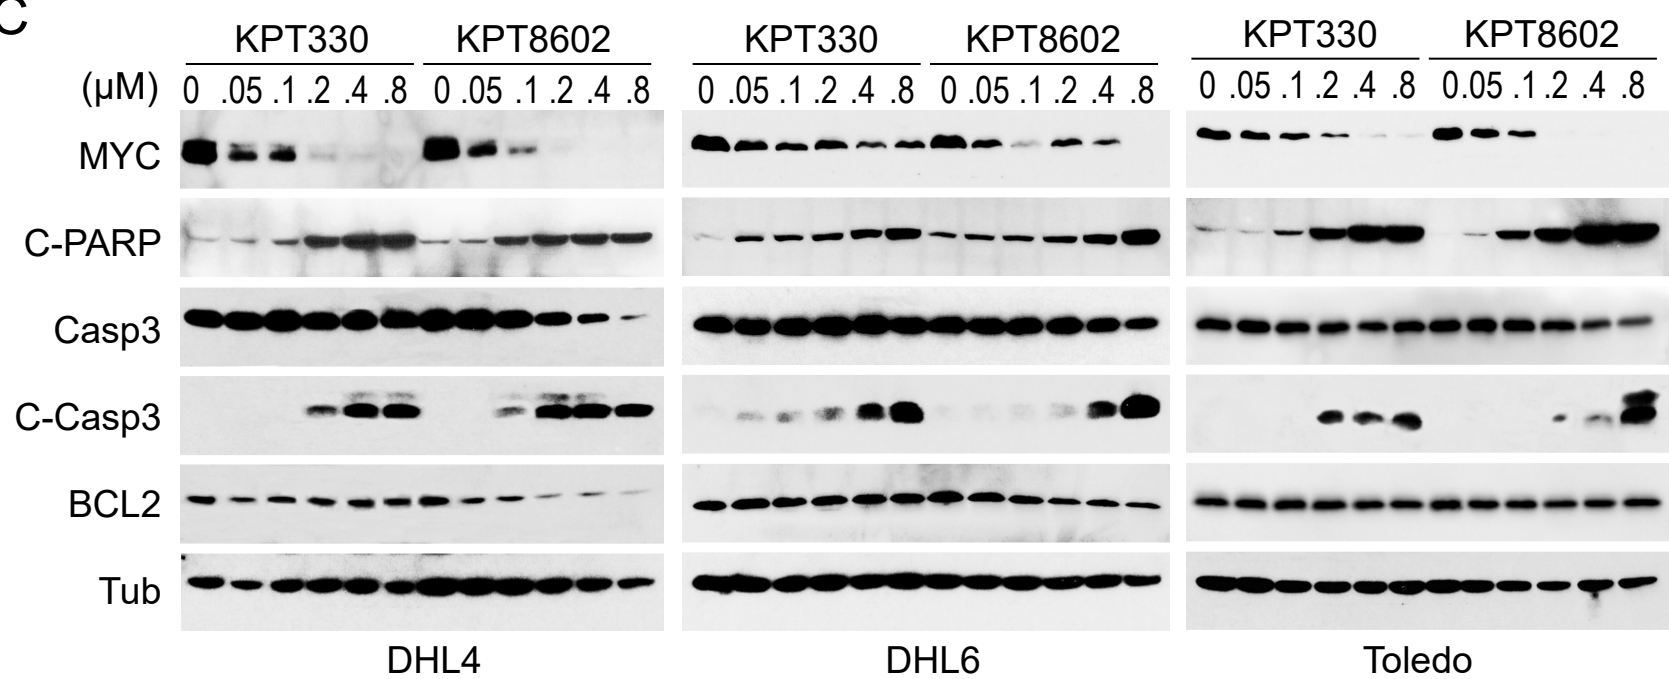

Figure S2

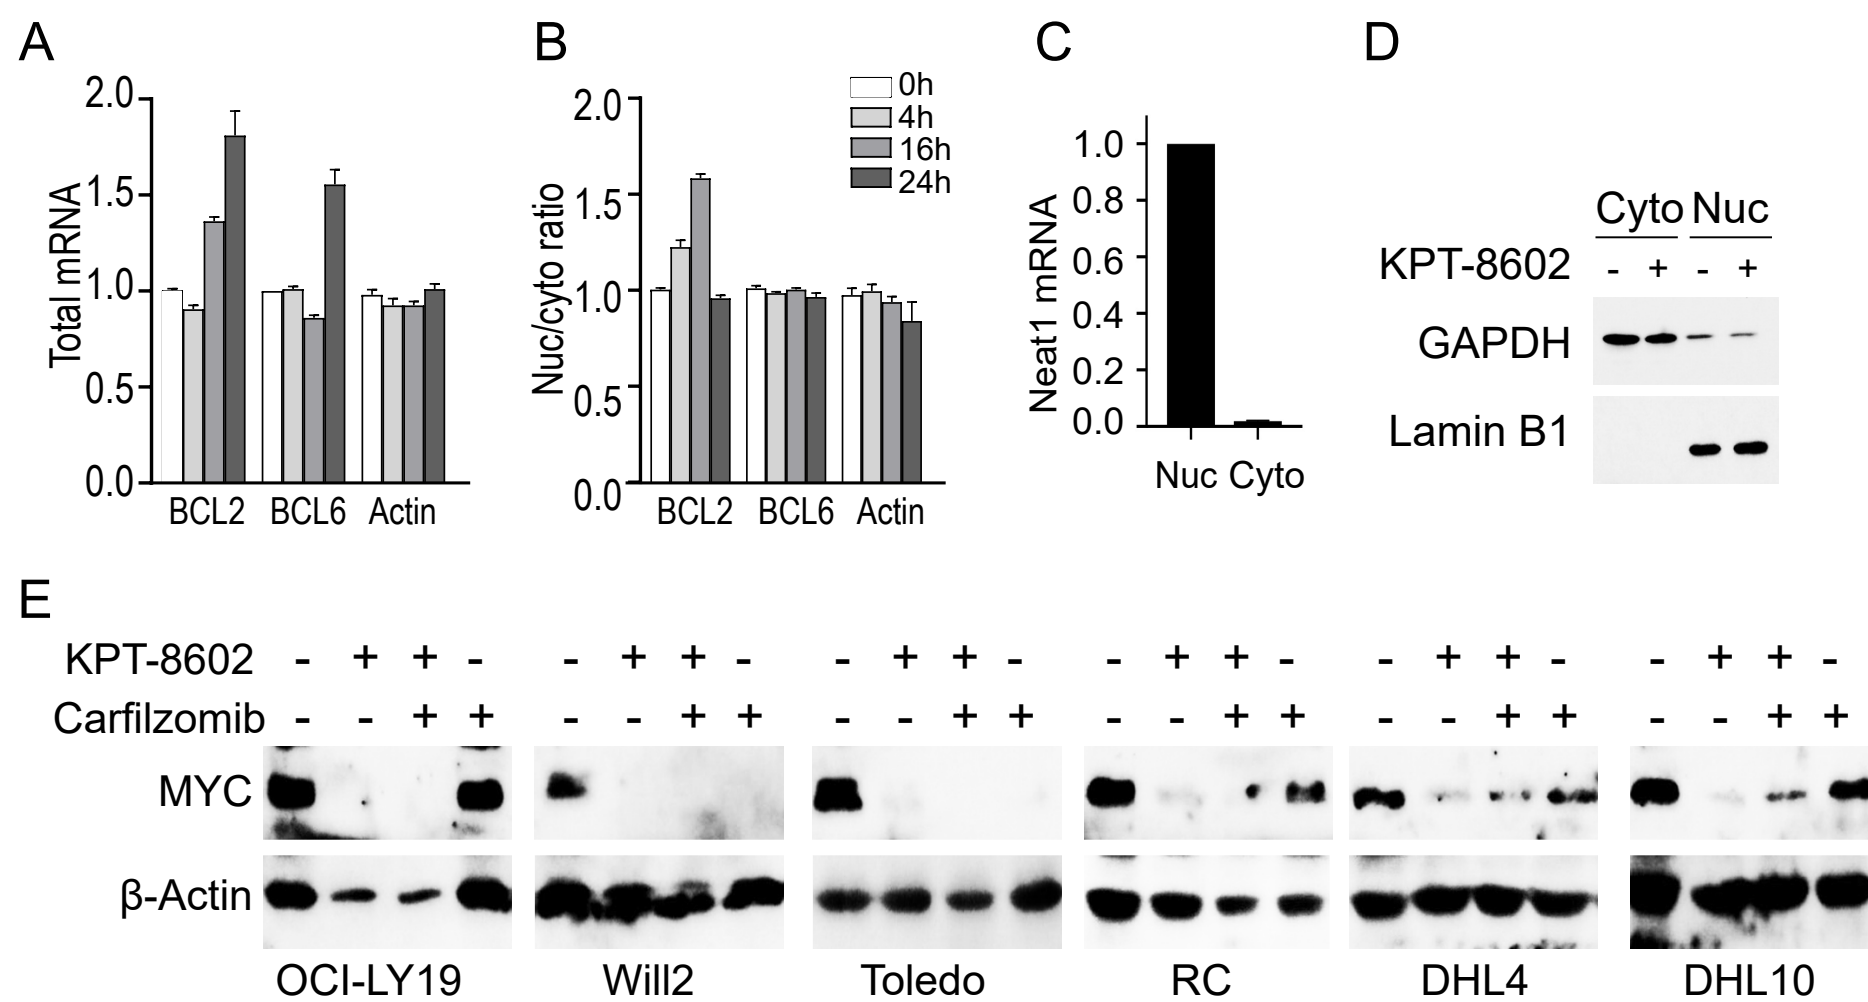

Figure S3

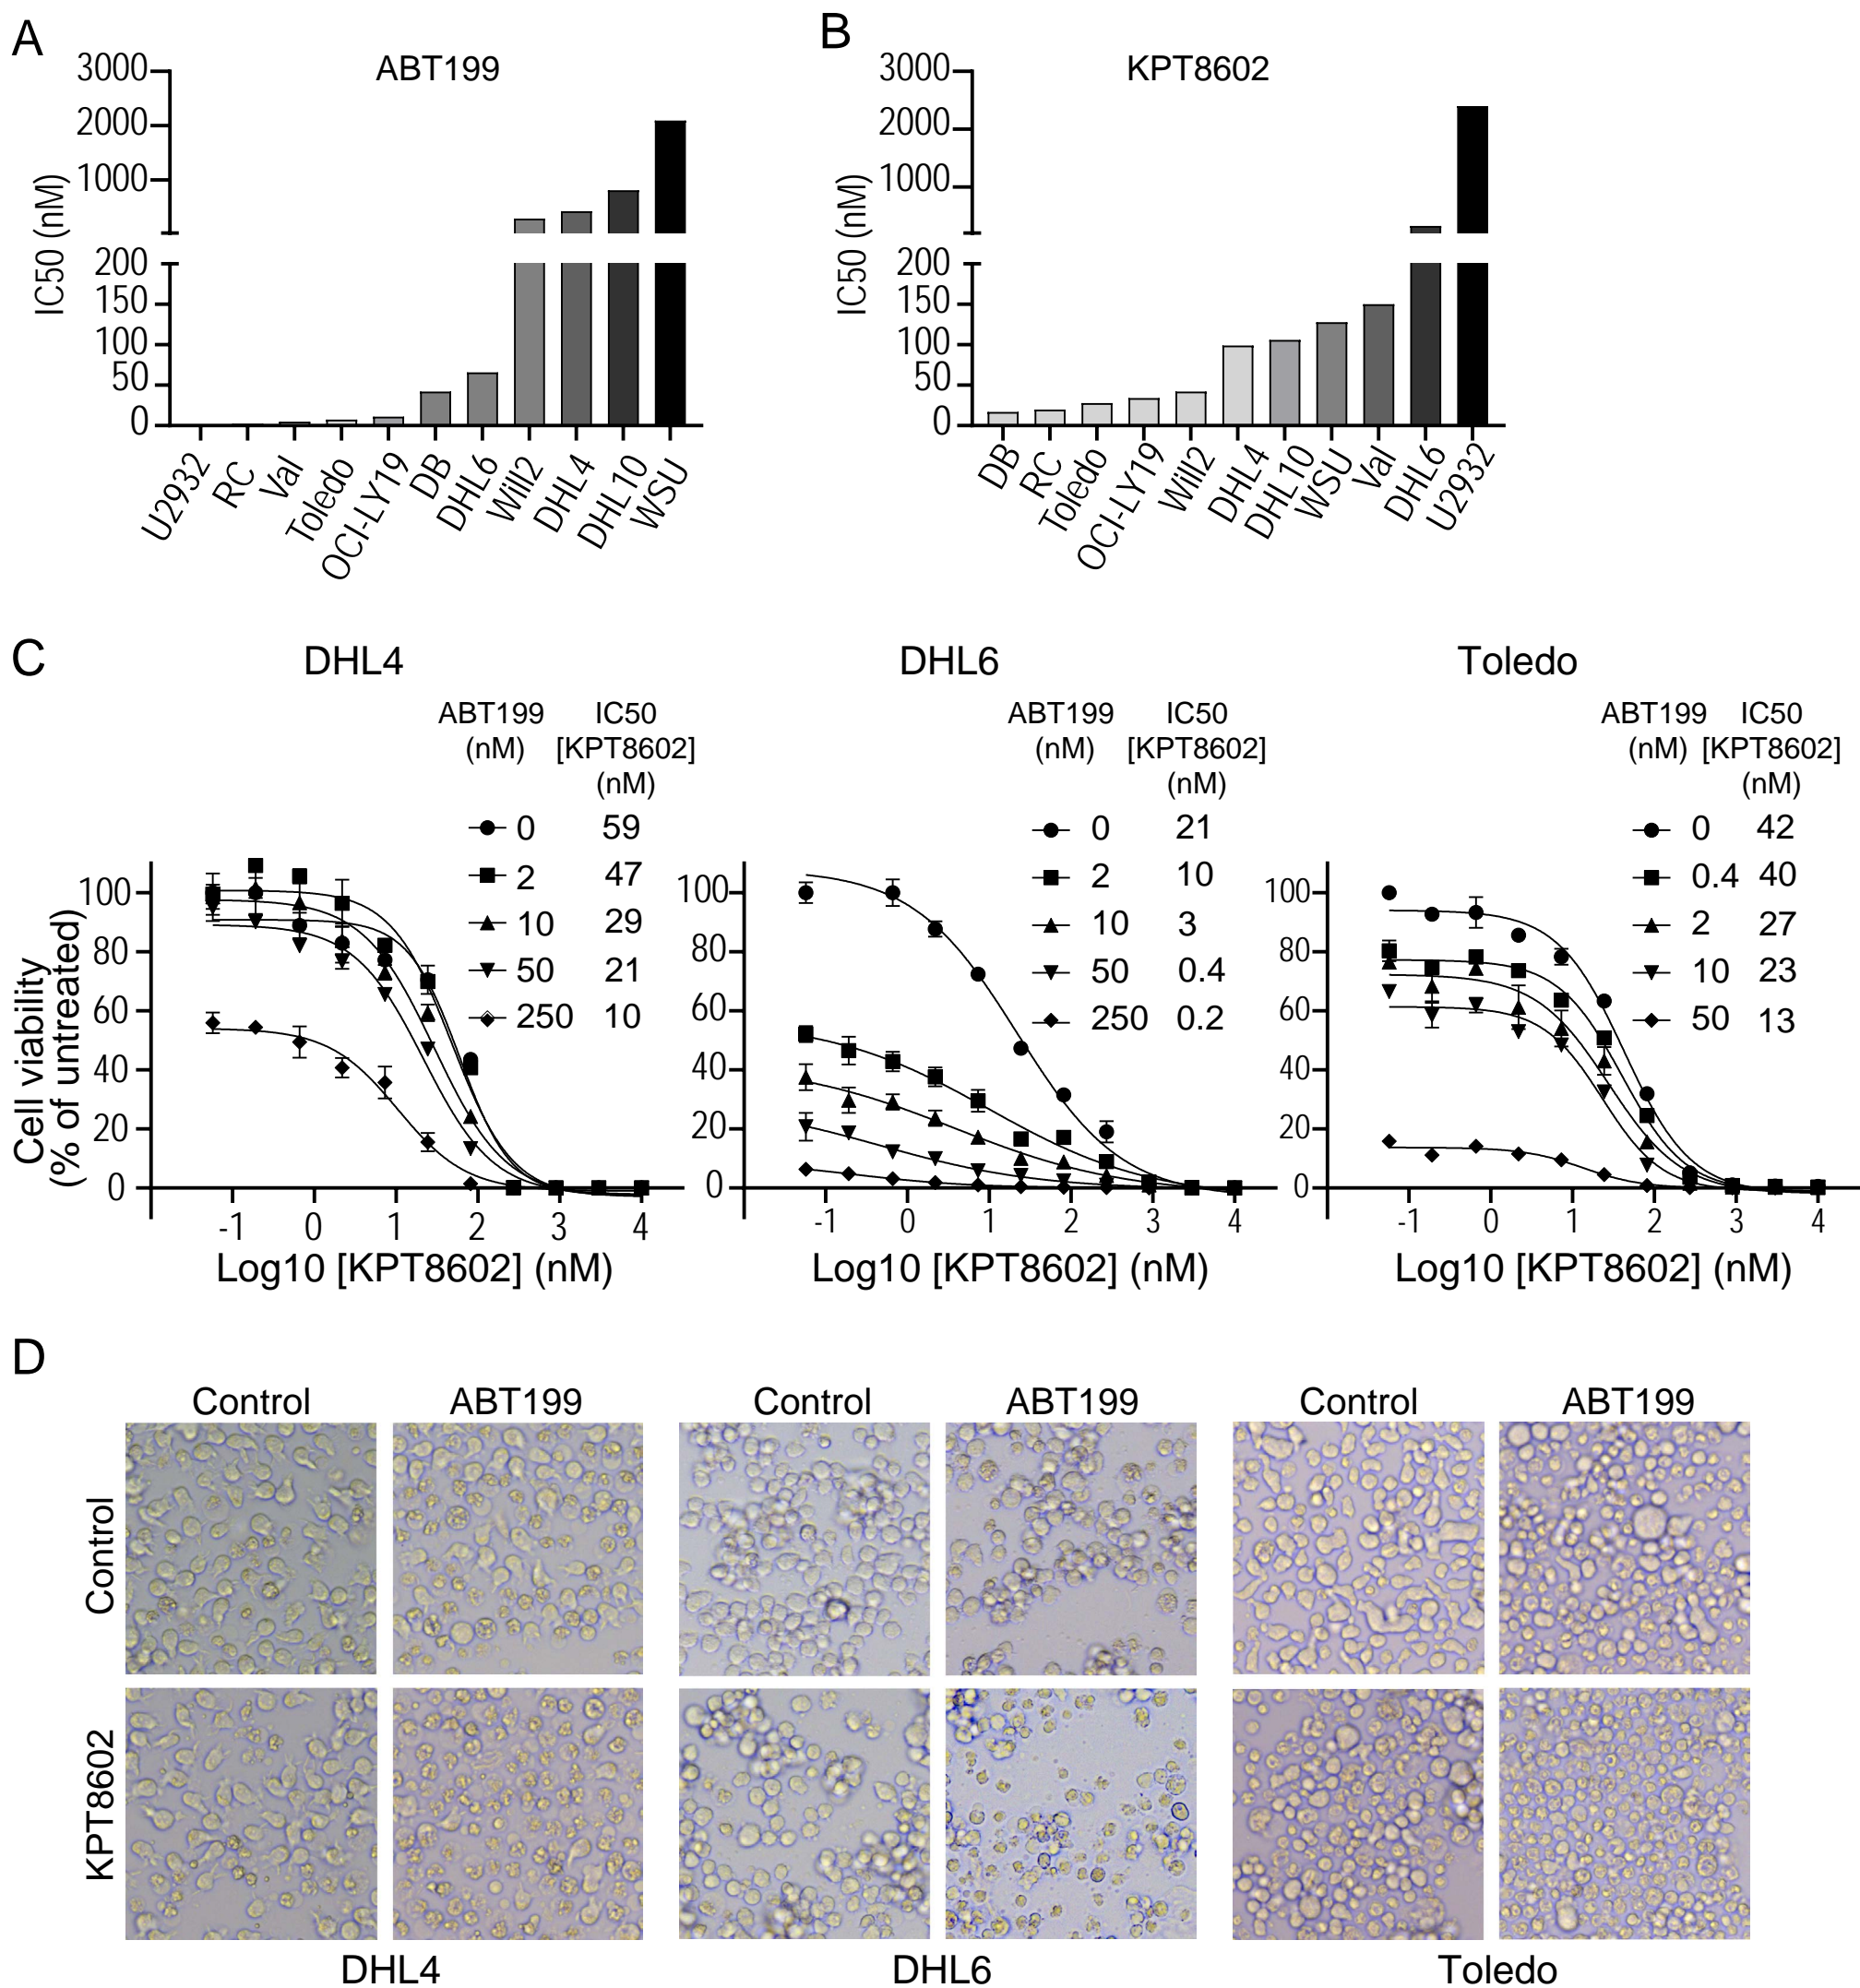

Figure S4

A

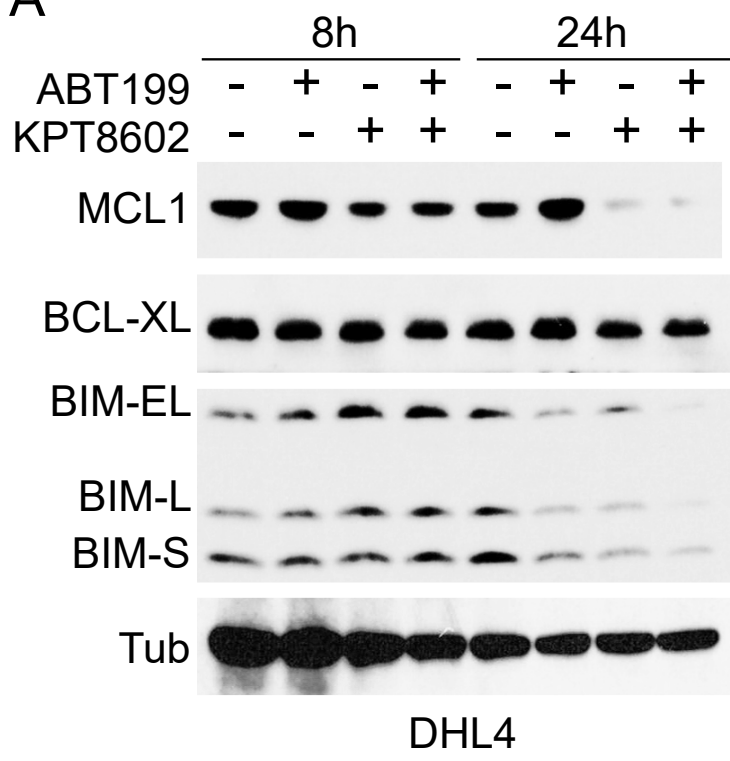

B

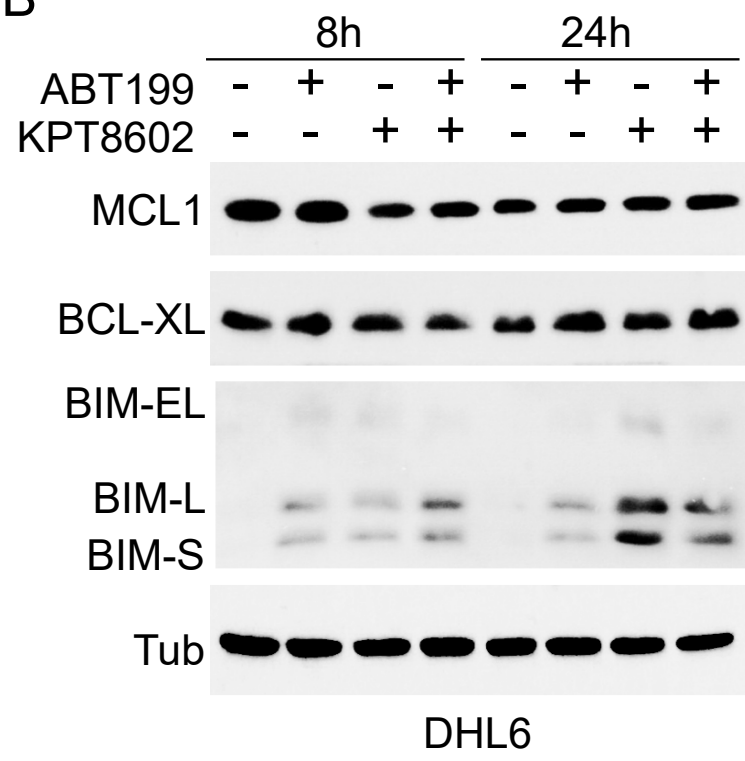

C

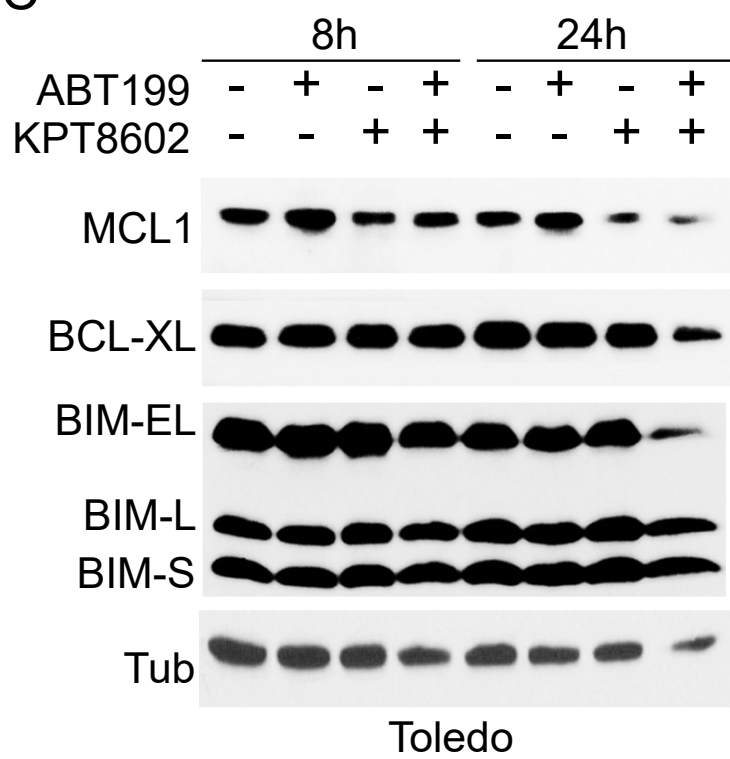

Figure S5

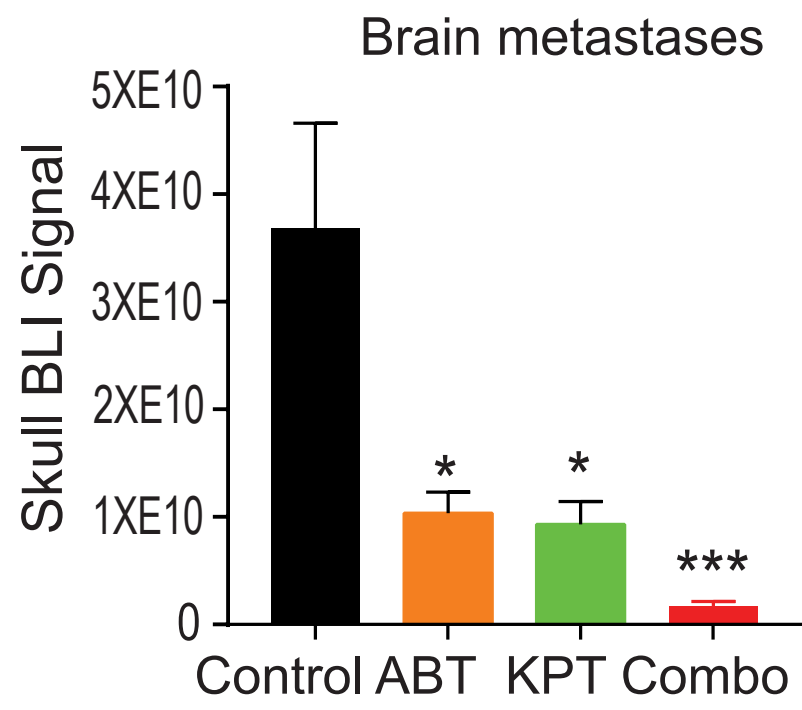

Supplement: 13045_2019_803_MOESM1_ESM.pdf [file 13045_2019_803_MOESM1_ESM.pdf]
